# Supplementary material
Source: HighWire-hosted journal article supplement (https://drc.bmj.com/content/5/1/e000390)
Supplement: inline-supplementary-material-1 [file inline-supplementary-material-1.docx]

Figure 1. Transition Care Components

**% Respondents**
